# Supplementary material for: Conjugation with Tris Decreases the Risk of Ketoprofen-Induced Mucosal Damage and Reduces Inflammation-Associated Methane Production in a Rat Model of Colitis
Source: MDPI journal article supplement (doi:10.3390/pharmaceutics15092329), 2023-09-16
Supplement: s1 [file s1]

Date: From ..... to .....

Experiment title:

Approval number:

Species and strain; sex:

Experiment leader:

Experimental ID:

|                    | Score | Condition:                                    | Day 1 | Day 2 | Day 3 | Day 4 |
|--------------------|-------|-----------------------------------------------|-------|-------|-------|-------|
| Condition of fur   | 0     | not altered                                   |       |       |       |       |
|                    | 1     | piloerection, dirty fur                       |       |       |       |       |
| Posture            | 0     | not altered                                   |       |       |       |       |
|                    | 1     | altered weight distribution                   |       |       |       |       |
|                    | 2     | hunched back, tremor                          |       |       |       |       |
| Mobility/Alertness | 0     | not altered                                   |       |       |       |       |
|                    | 1     | slow/stiff movement, no exploratory behaviour |       |       |       |       |
|                    | 2     | immobile                                      |       |       |       |       |
| Startle reflex     | 0     | not altered                                   |       |       |       |       |
|                    | 1     | decreased, slow reaction                      |       |       |       |       |
|                    | 2     | no reaction                                   |       |       |       |       |
| Weight             | 0     | + 0-5-10 gr                                   |       |       |       |       |
|                    | 1     | - 5-10 gr                                     |       |       |       |       |
|                    | 2     | - 15-20 gr                                    |       |       |       |       |
| Body temperature   | 0     | not altered                                   |       |       |       |       |
|                    | 1     | hypothermia/fever                             |       |       |       |       |
| Total score:       |       |                                               |       |       |       |       |
