# Supplementary material for: Conjugation with Tris Decreases the Risk of Ketoprofen-Induced Mucosal Damage and Reduces Inflammation-Associated Methane Production in a Rat Model of Colitis
Source: MDPI journal article supplement (doi:10.3390/pharmaceutics15092329), 2023-09-16

## Supplementary Figure S1: NMR characterization of Ket-Tris conjugate

NMR spectrum:

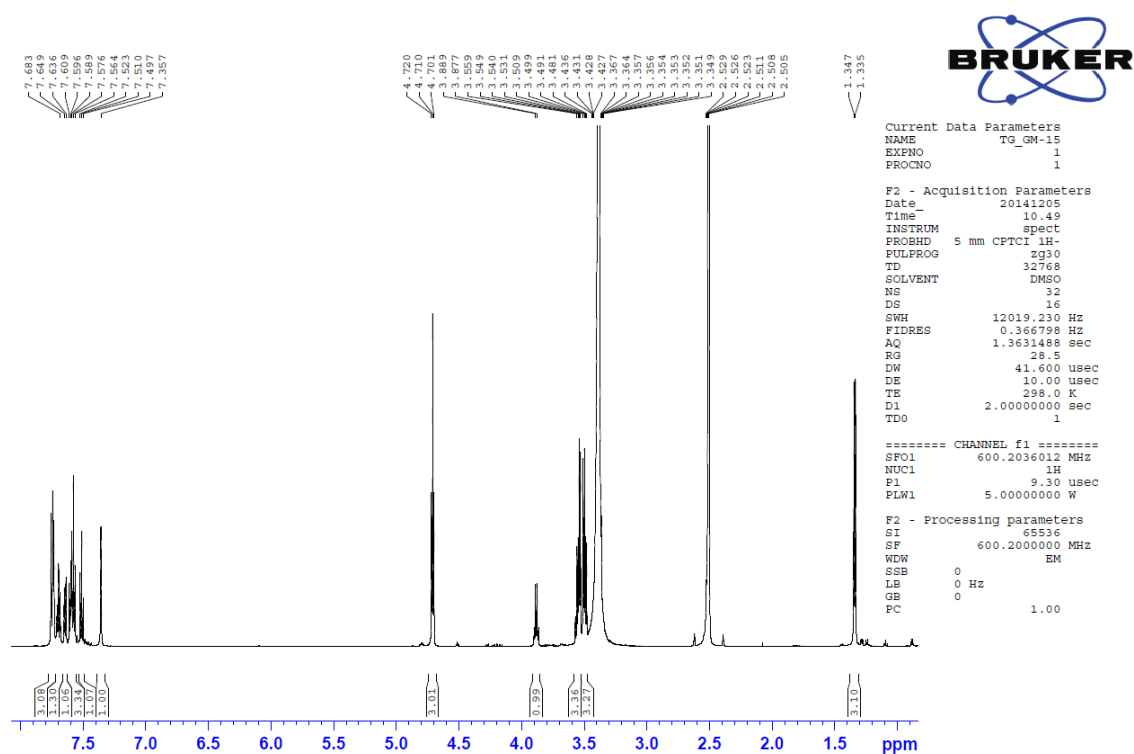

# <sup>13</sup>C NMR spectrum:

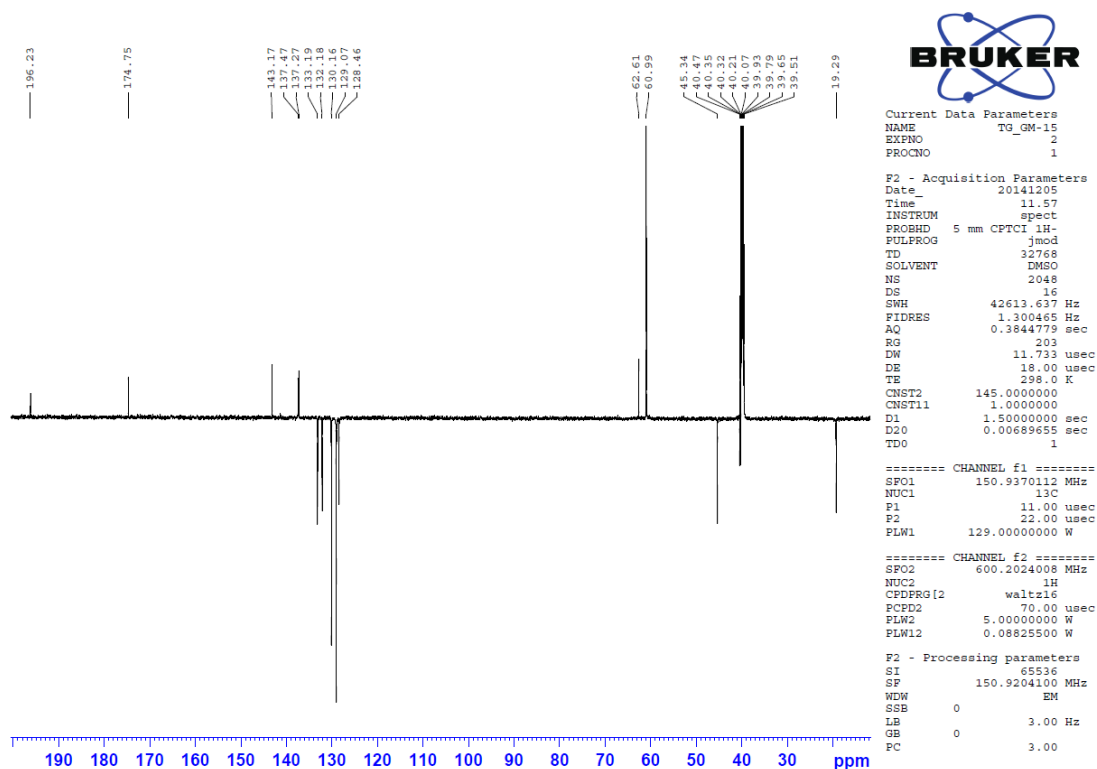

Supplement: s1 [file s1]
